# Supplementary material for: The Resistance Responses of Potato Plants to Potato Virus Y Are Associated with an Increased Cellular Methionine Content and an Altered SAM:SAH Methylation Index
Source: MDPI journal article supplement (doi:10.3390/v13060955), 2021-05-21
Supplement: s1 [file s1]

**Table 1.** Primers used for quantitative RT PCR

| Primer                                     | 5'-3' sequence                                        | Reference             | Primer Concentration (nM) | E (%) |
|--------------------------------------------|-------------------------------------------------------|-----------------------|---------------------------|-------|
| PVY <sup>o</sup> -F<br>PVY <sup>o</sup> -R | TATGATGGATTTGGCGACCACTTGT<br>TAAACTAGGCAGCTCTGCATCATG | Makarova et al., 2018 | 400                       | 95.7  |
| StMS-F<br>StMS-R                           | GTTAGTGAATACAAGGAGGCT<br>GCTGCTTTTGATAACAAGAGG        | PGSC0003DMG400008708* | 400                       | 98.5  |
| StSAMS-F<br>StSAMS-R                       | ATCACGACCAAGGCTATTGT<br>CAGGACTTTGCTGCTCAATG          | PGSC0003DMG400005855* | 400                       | 94.5  |
| StSAHH-F<br>StSAHH-R                       | AACTTTGCTTTTCCCTGCT<br>CGGCAATAAGGGCAACC              | PGSC0003DMG400004572* | 350                       | 94.5  |
| StSHM-F<br>StSHM-R                         | AGGTTGCTGATAAATGTGGG<br>CTCTTGTGTGTGGTGGTAG           | PGSC0003DMG400015745* | 350                       | 93.4  |
| StCBL-F<br>StCBL-R                         | TCTGCCTACCAACACAACC<br>TCCATCTCTTTGTCTCTTGAGC         | PGSC0003DMG400029836* | 350                       | 96.2  |
| StSAMDM-F<br>StSAMDM-R                     | TGATGGAAAGGTTTTGCCAC<br>AATTCACCATGAGACGACCA          | PGSC0003DMG400005855* | 400                       | 97.5  |
| StCOX-F<br>StCOX-R                         | GGTCGGACATACCTGAAAC<br>CCAAAAGTATGAAAAGCTGGAG         | Baebeler et al., 2011 | 350                       | 97.3  |
| StEF-1 $\alpha$ -F<br>StEF-1 $\alpha$ -R   | CTTGACGCTCTTGACCAGATT<br>GAAGACGGAGGGTTTGTCT          | Nicot et al., 2005    | 350                       | 98.7  |

Full references are provided in the main text. Primer concentrations giving the lowest threshold cycle ( $C_t$ ) value were utilized in RT-PCR and are listed in the Table. E, efficiency of PCR amplification as calculated by CFX Manager Software.

\*Gene sequences were retrieved from Plant Genomics Resource Phytozome 12 (<https://phytozome.jgi.doe.gov/pz/portal.html>).
